1 **Assessment of metagenomic sequencing and qPCR for detection of influenza D virus**  
2 **in bovine respiratory tract samples**

3 Maodong Zhang<sup>1</sup>, Yanyun Huang<sup>1,3</sup>, Dale L. Godson<sup>2,3</sup>, Champika Fernando<sup>2</sup>, Trevor W.  
4 Alexander<sup>4</sup> and Janet E. Hill<sup>2</sup>, \*

5  
6 <sup>1</sup> Department of Veterinary Pathology, Western College of Veterinary Medicine,  
7 University of Saskatchewan, Saskatoon, SK, Canada; Maodong.Zhang@usask.ca

8 <sup>2</sup> Department of Veterinary Microbiology, Western College of Veterinary Medicine,  
9 University of Saskatchewan, Saskatoon, SK, Canada; chf105@mail.usask.ca ;  
10 janet.hill@usask.ca

11 <sup>3</sup> Prairie Diagnostic Services Inc., Saskatoon, SK, Canada; yanyun.huang@usask.ca ;  
12 dale.godson@usask.ca

13 <sup>4</sup> Agriculture and Agri-Food Canada, Lethbridge Research and Development Centre,  
14 Lethbridge, AB, Canada; trevor.alexander@canada.ca

15 \* Correspondence: Janet.Hill@usask.ca

16

17 **Abstract:** High throughput sequencing is currently revolutionizing the genomics field and  
18 providing new approaches to the detection and characterization of microorganisms. The  
19 objective of this study was to assess the detection of influenza D virus (IDV) in bovine  
20 respiratory tract samples using two sequencing platforms (MiSeq and Nanopore  
21 (GridION)), and species-specific qPCR. An IDV-specific qPCR was performed on 232  
22 samples (116 nasal swabs and 116 tracheal washes) that had been previously subject to  
23 virome sequencing using MiSeq. Nanopore sequencing was performed on 19 samples  
24 positive for IDV by either MiSeq or qPCR. Nanopore sequence data was analyzed by two  
25 bioinformatics methods: What's In My Pot (WIMP, on the EPI2ME platform), and an in-  
26 house developed analysis pipeline. The agreement of IDV detection between qPCR and  
27 MiSeq was 82.3%, between qPCR and Nanopore was 57.9% (in-house) and 84.2%  
28 (WIMP), and between MiSeq and Nanopore was 89.5% (in-house) and 73.7% (WIMP).  
29 IDV was detected by MiSeq in 14 of 17 IDV qPCR-positive samples with C<sub>q</sub> (cycle  
30 quantification) values below 31, despite multiplexing 50 samples for sequencing. When  
31 qPCR was regarded as the gold standard, the sensitivity and specificity of MiSeq sequence  
32 detection were 28.3% and 98.9%, respectively. We conclude that both MiSeq and  
33 Nanopore sequencing are capable of detecting IDV in clinical specimens with a range of C<sub>q</sub>  
34 values. Sensitivity may be further improved by optimizing sequence data analysis,  
35 improving virus enrichment, or reducing the degree of multiplexing.

36 **Keywords:** Illumina MiSeq sequencing; influenza D virus; Nanopore GridION sequencing;  
37 qPCR; diagnostics; bovine respiratory disease

## 38 1. Introduction

39 High throughput sequencing is currently revolutionizing the genomics field and  
40 providing new approaches to the detection and characterization of viruses. The utilization of  
41 metagenomic sequencing to elucidate genome sequences of viruses, particularly RNA  
42 viruses, directly from clinical samples offers several benefits. First, metagenomics enables  
43 identification and genomic characterization of unexpected viruses or even novel viruses  
44 either as primary pathogens or as co-infectants, without prior knowledge of their clinical  
45 significance [1]. Second, it eliminates the need for ongoing optimization of primers and/or  
46 probes for rapidly evolving or highly diverse RNA viruses [2]. Third, it facilitates routine  
47 surveillance and early detection of outbreaks of novel virus strains that are distinct from  
48 currently circulating strains. Finally, the development of portable sequencing devices creates  
49 the potential for timely identification of routine cases or outbreaks in the field [3,4].  
50 Sequencing technology continues to evolve rapidly. With the capability of generating long  
51 reads, relatively lower set-up cost and portability, Oxford Nanopore sequencing has attracted  
52 increasing attention for its potential advantages in some circumstances over short-read  
53 sequencing technologies [5,6].

54 Metagenomic sequencing has been widely used for non-targeted detection of viruses and  
55 has been applied to identify several “new” viruses associated with bovine respiratory disease  
56 (BRD) [7-10]. In dairy cattle, bovine adenovirus 3 (BAdV3), bovine rhinitis A virus (BRAV)  
57 and influenza D virus (IDV) showed significant association with BRD [9]. In beef cattle,  
58 bovine rhinitis B virus (BRBV), BRAV and IDV showed statistical association with BRD  
59 [8,10]. Among all of the viruses detected by sequencing of the bovine respiratory tract  
60 metagenome, influenza D virus (IDV) has been identified as a common virus associated with  
61 BRD in both beef and dairy cattle, suggesting the potential contribution of IDV to BRD [8-  
62 10]. Influenza D virus (IDV) belongs to the Orthomyxoviridae, and is a single-stranded,  
63 enveloped, segmented and negative-sense RNA virus [11]. Since its discovery in swine in

64 USA in 2011, IDV has been reported all over the world, and cattle are thought to be the  
65 natural host reservoir [10,12-15]. In addition to cattle and swine, IDV has been reported in  
66 sheep, goats, laboratory animals (ferrets and guinea pigs), and seropositivity has been  
67 detected in humans [14,16-18]. Concerns about interspecies transmission and potential  
68 zoonosis have been raised due to the high seroprevalence of IDV antibodies in people  
69 exposed to cattle [16].

70 Given the diversity of viruses now known to be associated with BRD and the potential  
71 for discovery of novel viruses like IDV, there is increasing interest in application of  
72 metagenomic sequencing for diagnostics, since screening for many individual viruses using  
73 targeted PCR assays quickly becomes logistically complex, expensive and time-consuming.  
74 The relative performance of metagenomic sequencing compared to PCR in terms of  
75 analytical sensitivity, however, has not been widely explored. In this study, IDV was used as  
76 a representative BRD-associated virus to examine the feasibility of using metagenomic  
77 sequencing for detection of viruses in clinical bovine respiratory samples. We compared  
78 results of long-read sequencing on the Oxford Nanopore GridION platform and previously  
79 generated Illumina MiSeq data [10] to the results of an IDV-specific qPCR. The objective  
80 was to assess IDV detection using all three approaches applied to a set of bovine respiratory  
81 tract samples containing a range of viral loads.

## 82 **2. Materials and Methods**

### 83 *2.1. Ethics statement*

84 The samples used in this study were collected as part of a previous study [10]. Collection  
85 of the samples was approved by the University of Calgary Veterinary Sciences Animal Care  
86 Committee (AC15 - 0109).

### 87 *2.2. Sample preparation*

88 The overall sample preparation workflow is shown in Figure 1a. Sample collection and  
89 preparation were described previously [10,19]. Briefly, paired nasal swabs (n = 116) and  
90 tracheal washes (n = 116) were collected from cattle with BRD and healthy controls from  
91 four different feedlots in Alberta, Canada between November 2015 and January 2016 [19].  
92 The samples were centrifuged and supernatants were treated with DNase (Life Technologies,  
93 Carlsbad, CA) and RNase (Promega, Madison, WI), followed by extraction of viral nucleic  
94 acids using a commercial kit (QIAamp MinElute virus spin kit, Qiagen, Venlo, Netherlands).  
95 A portion (2.5 µl) of extracted total nucleic acids was used directly as a template for IDV  
96 qPCR and another portion (7 µl) used to generate cDNA for sequencing. The first strand was  
97 reverse transcribed with primer FR26RV-N using Superscript III enzyme (Life Technologies,  
98 Carlsbad, CA), followed by complementary strand synthesis using Sequenase polymerase  
99 (Affymetrix, Santa Clara, CA) as per manufacturer's instructions [20]. Double-stranded  
100 DNA was purified using NucleoMag beads (Macherey-Nagel Inc., Bethlehem, PA) and  
101 subsequently subjected to random amplification with primer FR20RV prior to sequencing  
102 library preparation [20].

### 103 *2.3. qPCR confirmation and quantification*

104 Quantitative real-time PCR for IDV was performed on the extracted total nucleic acids  
105 for each sample (total number of samples = 232) using previously described primers and  
106 probe specific for IDV [21]. The qPCR was carried out using AgPath-ID One-Step RT-PCR  
107 reagents in a total volume of 12.5 µl, which included 2.5µl template, 4 pM forward/reverse  
108 primers, 2 pM probe and 0.5 µl AmpliTaq Gold DNA polymerase in a Bio-Rad CFX 96 Real-  
109 Time Detection System (Bio-Rad, Hercules, CA). The following cycling conditions were  
110 used: reverse transcription phase at 48 °C for 30 min; initial activation phase at 95 °C for 10  
111 min; 40 two-step cycles of denaturation at 95 °C for 15 s; and annealing and extension at 60  
112 °C for 1 min. To obtain a positive control template, a DNA fragment corresponding to a 170

113 bp portion of the PB1 gene of IDV (accession number: JQ922306) was synthesized and  
114 inserted into pUC57-Amp vector (Bio Basic, Markham, ON). A 10-fold dilution series of the  
115 positive control plasmid was used to construct a standard curve to determine the efficiency  
116 of the PCR. All samples were tested in duplicate along with the standard curve and no  
117 template controls. Samples for which both of the duplicates gave a sigmoid amplification  
118 curve with a C<sub>q</sub> (cycle quantification) value were considered positive.

#### 119 *2.4. GridION library preparation and sequencing*

120 Nineteen samples that were IDV positive by either MiSeq virome sequencing or qPCR  
121 (with a range of representative C<sub>q</sub> values) were conveniently selected for Nanopore  
122 sequencing. Three batches of six samples were multiplexed and run on individual flow cells,  
123 while one sample (sample 129) was run individually. The DNA used for GridION Nanopore  
124 library preparation was from the same randomly amplified DNA that was used for MiSeq  
125 sequencing (Figure. 1A). Ligation 1D sequencing kit SQK-LSK108 was used for library  
126 preparation. End-repair and dA-tailing were performed on randomly amplified DNA for each  
127 sample using NEBNext FFPE DNA repair mix and Ultra II End-prep enzyme mix (New  
128 England Biolabs, Ipswich, MA). After purification with AMPure XP beads (Beckman  
129 Coulter, Brea, CA), native barcode ligation using the EXP-NBD103 barcode kit (Oxford  
130 Nanopore Technologies, Oxford, UK) and Blunt/TA Ligase master mix (New England  
131 Biolabs, Ipswich, MA) was performed as per manufacturer's instructions. The concentration  
132 of barcoded libraries was determined using a Qubit fluorometer (ThermoFisher Scientific,  
133 Waltham, MA) and subsequently equimolar amounts of each barcoded library (total amount  
134 = 1 µg) were pooled, and adaptors were added using Quick T4 DNA Ligase (New England  
135 Biolabs, Ipswich, MA). Each pooled library (14.5 µl) was mixed with 35 µl Priming Buffer  
136 and 25.5 µl Loading Beads and loaded dropwise through the sample port into the flow cell  
137 (FLO-MIN106) as per manufacturer's instructions. The MinKNOW platform QC check

138 confirmed at least 800 available pores, and the High Accuracy Basecalling (HAC) Flip-flop  
139 model was applied.

#### 140 *2.5. Bioinformatic analysis*

141 The workflow of bioinformatic analysis is illustrated in Figure 1b. Once Nanopore raw  
142 data were demultiplexed and trimmed using Porechop and passed the quality score (Qscore)  
143 7, high quality reads were aligned to the bovine genome (BioProject Accessions  
144 PRJNA33843, PRJNA32899) using Minimap2, and unmapped reads (i.e. non-host derived  
145 reads) from each sample were de novo assembled using Trinity [22-24]. Assembled contigs  
146 were mapped to the virus Reference Sequence (RefSeq) database using BLASTn and virus-  
147 like contigs with a minimum alignment length of 100 bp and an expectation (e) value  $< 10^{-3}$   
148 were further examined by BLASTx alignment to the GenBank non-redundant protein  
149 sequence database to confirm the nucleotide sequence-based identification and to remove  
150 any spurious matches [25]. The total number of viral reads was determined as previously  
151 described [10].

152 Quality filtered reads from the Nanopore sequencing were also uploaded to the EPI2ME  
153 platform for analysis with the WIMP (What's in My Pot, version 2.3.7) application for  
154 taxonomic classification of reads.

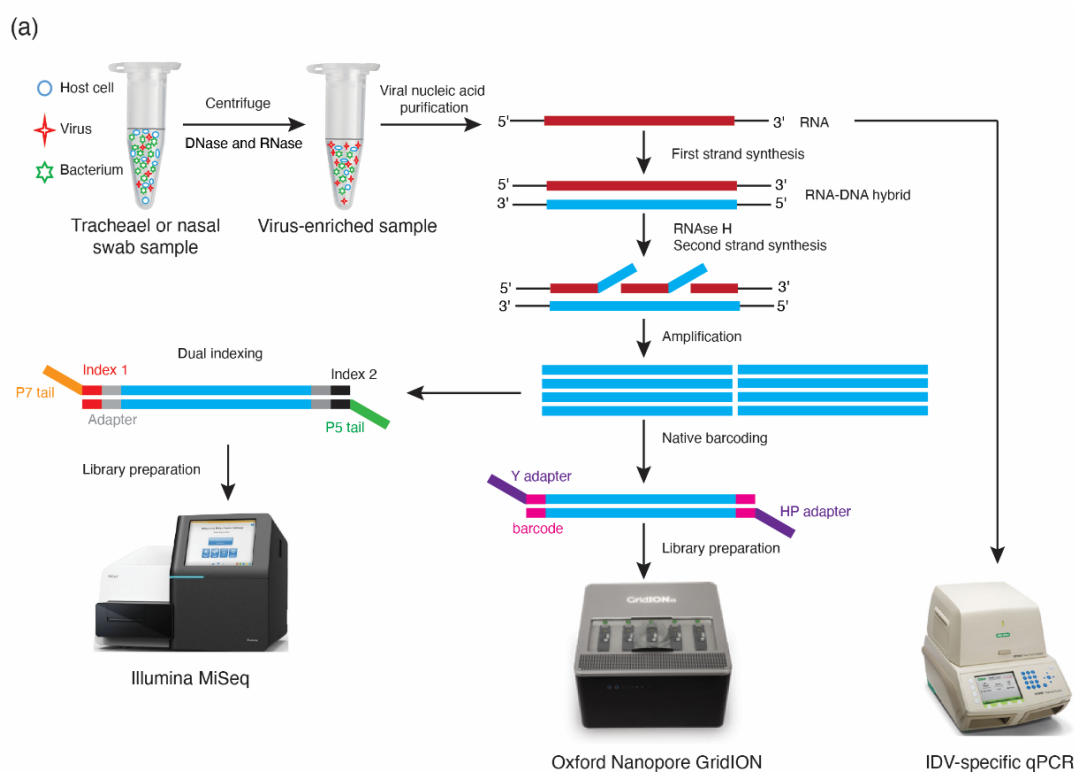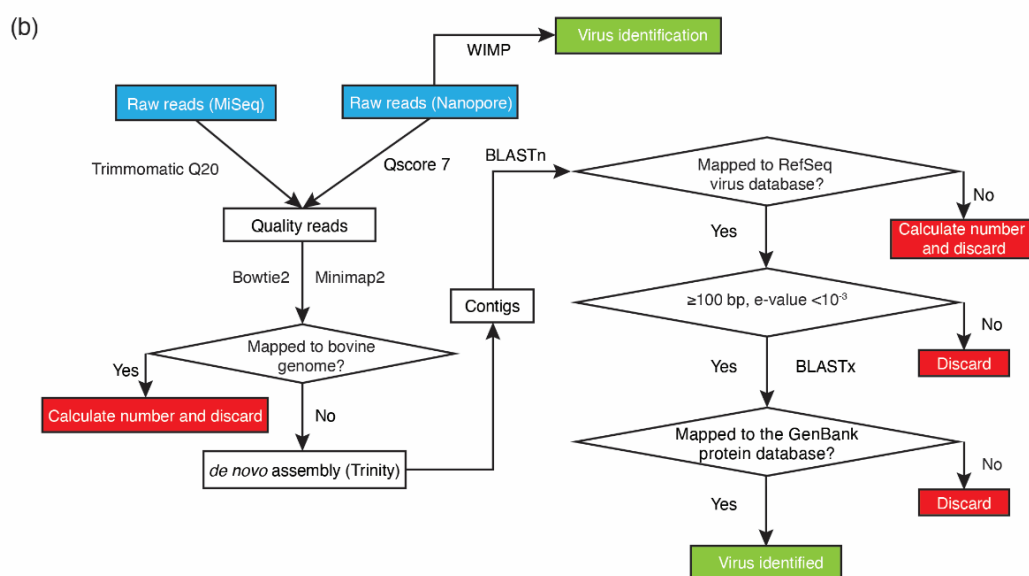

155

156 **Figure 1.** Workflow for GridION Nanopore sequencing, MiSeq sequencing, and  
 157 qPCR of bovine respiratory tract samples. **(a)** The workflow illustrates both the  
 158 sample and library preparation. Extracted RNA was used directly for qPCR, while  
 159 DNA randomly amplified from the same extracts were used for MiSeq sequencing  
 160 and GridION Nanopore sequencing; **(b)** Bioinformatic workflow to identify viruses  
 161 in BRD samples. WIMP analysis was used only for Nanopore data. The remaining  
 162 analysis was the same for data from both MiSeq and GridION Nanopore sequencing  
 163 except Minimap2 was used instead of Bowtie2 in for host sequence subtraction.

164



## 165 3. Results

### 166 3.1. Comparison of IDV detection by MiSeq and qPCR

167 A total of 232 samples (116 nasal swabs and 116 tracheal washes) that had been  
168 sequenced using MiSeq previously (500 cycle V2 chemistry, libraries of 50 multiplexed  
169 samples) were tested by an IDV-specific qPCR (Figure 1a) [10]. The detection limit of the  
170 PCR was demonstrated to be 62.5 copies per reaction (data not shown). There were 53 IDV  
171 positive samples based on the qPCR and the range of Cq values was from 16.99 ( $6.25 \times 10^7$   
172 copies per reaction) to 39.46 (6.88 copies per reaction) with median Cq value being 34.07  
173 ( $2.91 \times 10^2$  copies per reaction). The agreement of IDV detection between qPCR and MiSeq  
174 was 82.8%. When qPCR was regarded as the gold standard, the sensitivity and specificity of  
175 MiSeq detection were 28.3% and 98.9%, respectively. IDV was detected by MiSeq in 14 of  
176 17 IDV qPCR-positive samples with Cq values below 31 (Figure 2), when multiplexing 50  
177 samples in the MiSeq flow cell. Only 1 of 36 IDV qPCR-positive samples with a Cq value  
178 above 31 was detected by MiSeq (Figure 2). Nineteen samples that were positive for IDV by  
179 qPCR or MiSeq, and that represented the full range of qPCR Cq values, were selected for  
180 further analysis by Nanopore sequencing.

181

182

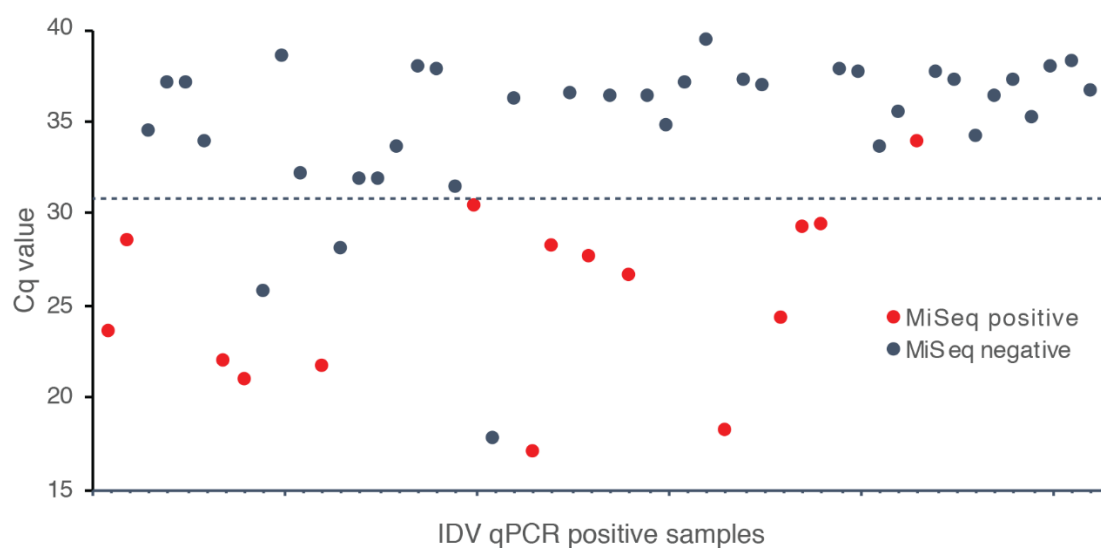

183

184 **Figure 2.** Cq values and MiSeq detection results for 53 samples positive by IDV  
185 qPCR. Samples positive for both qPCR and MiSeq are indicated by red dots. The  
186 majority of concurrent detection by MiSeq and qPCR occurred in samples with Cq  
187 values <31 (dotted line).

### 188 3.2. Comparison of Nanopore sequencing results to previously determined MiSeq data

189 A total of 82.7 million reads were obtained from MiSeq. When removed low-quality  
190 reads and host-derived reads, 33.6 million reads were remained. A total of 1.8 million high-  
191 quality viral reads were generated, accounting for 2.19% of the total reads obtained from  
192 MiSeq [10]. A total of 5.9 million Nanopore reads including unclassified (30.5%) and  
193 classified reads (69.5%) passed the quality filter (Qscore 7) using MinKNOW. After  
194 subtracting reads reported as “unclassified” by WIMP, a total of 0.41 million viral reads were  
195 obtained, accounting for 6.9% of total reads obtained (Figure 3). The proportion of viral reads  
196 per sample was 0.1% to 18.4% (Nanopore, WIMP analysis) compared to 0.03% to 3.1% for  
197 the previously generated MiSeq data; however, with both sequencing approaches, the  
198 majority of reads obtained were identified as host-derived or other (bacteria, fungi,  
199 unclassified) (Figure 3).

200

201 **Table 1.** Summary of data from Nanopore, MiSeq and qPCR on detection of IDV for  
 202 each individual sample.

| Sample* | Cq value | Copy number<br>(per reaction) | Number (%) of IDV reads |                        |              | Largest IDV contig (bp) |       | Total input reads |           |
|---------|----------|-------------------------------|-------------------------|------------------------|--------------|-------------------------|-------|-------------------|-----------|
|         |          |                               | Nanopore<br>(WIMP)      | Nanopore<br>(In-house) | MiSeq        | Nanopore<br>(In-house)  | MiSeq | Nanopore          | MiSeq     |
| 129     | 16.99    | 6.25×10 <sup>7</sup>          | 321,638 (14.69)         | 606,932 (27.72)        | 2,182 (1.48) | 2030                    | 951   | 2,188,805         | 147,341   |
| 114     | 17.53    | 1.31×10 <sup>7</sup>          | 8 (<0.01)               | ND                     | ND           | N/A                     | N/A   | 335,559           | 136,961   |
| 50      | 20.71    | 1.25×10 <sup>6</sup>          | 1,088 (5.74)            | 1625 (8.57)            | 162 (1.1)    | 1161                    | 498   | 18,966            | 14,719    |
| 69      | 21.69    | 4.48×10 <sup>5</sup>          | 944 (7.83)              | 2287 (18.97)           | 1,812 (0.69) | 980                     | 842   | 12,053            | 263,262   |
| 42      | 22.04    | 2.86×10 <sup>5</sup>          | 608 (0.34)              | 584 (0.33)             | 26 (0.07)    | 986                     | 499   | 179,559           | 37,560    |
| 6       | 23.33    | 2.16×10 <sup>5</sup>          | 281 (1.44)              | 350 (1.8)              | 183 (0.08)   | 1034                    | 522   | 19,512            | 228,875   |
| 10      | 24.09    | 1.31×10 <sup>5</sup>          | 1,656 (1.17)            | 1650 (1.11)            | 87 (0.2)     | 1359                    | 485   | 148,381           | 44,433    |
| 199     | 26.01    | 4.64×10 <sup>4</sup>          | 4,211 (10.99)           | 10861 (28.34)          | 3,250 (1.49) | 2308                    | 552   | 38,329            | 218,800   |
| T50     | 26.76    | 2.93×10 <sup>4</sup>          | 3 (<0.01)               | ND                     | ND           | N/A                     | N/A   | 43,193            | 1,256,918 |
| T129    | 28.20    | 8.00×10 <sup>3</sup>          | 403 (0.23)              | 502 (0.28)             | 34 (<0.01)   | 843                     | 327   | 177,706           | 444,979   |
| 70      | 28.71    | 5.70×10 <sup>3</sup>          | 2 (0.02)                | ND                     | ND           | N/A                     | N/A   | 12,211            | 160,704   |
| T10     | 29.15    | 5.50×10 <sup>3</sup>          | 29 (0.54)               | ND                     | 455 (0.03)   | N/A                     | 913   | 5,413             | 1,415,256 |
| 13      | 29.22    | 4.15×10 <sup>3</sup>          | 116 (0.10)              | 152 (0.13)             | 48 (0.04)    | 626                     | 470   | 119,073           | 132,847   |
| 32      | 33.60    | 2.18×10 <sup>2</sup>          | ND                      | ND                     | ND           | N/A                     | N/A   | 275,387           | 32,312    |
| 170     | 35.62    | 8.25×10 <sup>1</sup>          | 1,080 (2.03)            | 1991 (3.75)            | 8,167 (0.74) | 903                     | 1,584 | 53,131            | 1,100,167 |
| 135     | 36.51    | 4.88×10 <sup>1</sup>          | 10 (<0.01)              | ND                     | ND           | N/A                     | N/A   | 142,737           | 154,220   |
| 260     | 39.46    | 6.88                          | 9 (<0.01)               | ND                     | ND           | N/A                     | N/A   | 164,607           | 959,935   |
| T30     | ND       | -                             | 3 (<0.01)               | ND                     | 2 (<0.01)    | N/A                     | 249   | 139,037           | 1,156,213 |
| T52     | ND       | -                             | 51 (0.1)                | 52 (0.1)               | 497 (0.05)   | 1616                    | 1,341 | 51,180            | 930,628   |

203 Cq = quantification cycle; ND = not detected; WIMP = What's In My Pot; bp = basepair

204 \*Samples beginning with T are tracheal, all others are nasal swabs.

205

206 In addition to WIMP classification of quality-filtered Nanopore reads, we also performed  
 207 a *de novo* assembly of the Nanopore reads. The largest IDV contigs assembled for each  
 208 sample from Nanopore data (using the in-house bioinformatics workflow, Figure 1b) were  
 209 generally longer than those from MiSeq data and ranged from 626 to 2308 bp (Nanopore),  
 210 and 249 to 1584 bp (MiSeq) (Table 1). The genome (or genome segment) coverage of each  
 211 largest contig from each sample was from 10.53% to 95.31%. The proportion of Nanopore  
 212 reads mapped to IDV for each sample by in-house analysis was higher than that from MiSeq  
 213 except for sample T10 and T30. The proportion of IDV reads identified in the WIMP analysis  
 214 of the Nanopore data, however, was generally comparable to that from the Nanopore (in-  
 215 house) workflow (Table 1). The proportion of reads identified as IDV in Nanopore (WIMP),

216 Nanopore (in-house) and MiSeq sequencing was generally extremely low (average 2.51%,  
217 17.03% and 0.46%, respectively). As expected, approximately six times more reads were  
218 obtained for the individually sequenced sample 129 than for those from the multiplexed  
219 samples (Table 1). Sample 129 also had the lowest Cq value in the IDV qPCR (16.99,  
220 corresponding to  $6.25 \times 10^7$  copies per reaction) and the highest proportion of IDV reads in  
221 the metagenomic sequencing results (Nanopore-WIMP 14.69%, Nanopore-in-house 27.72%,  
222 MiSeq 1.48%) (Table 1).

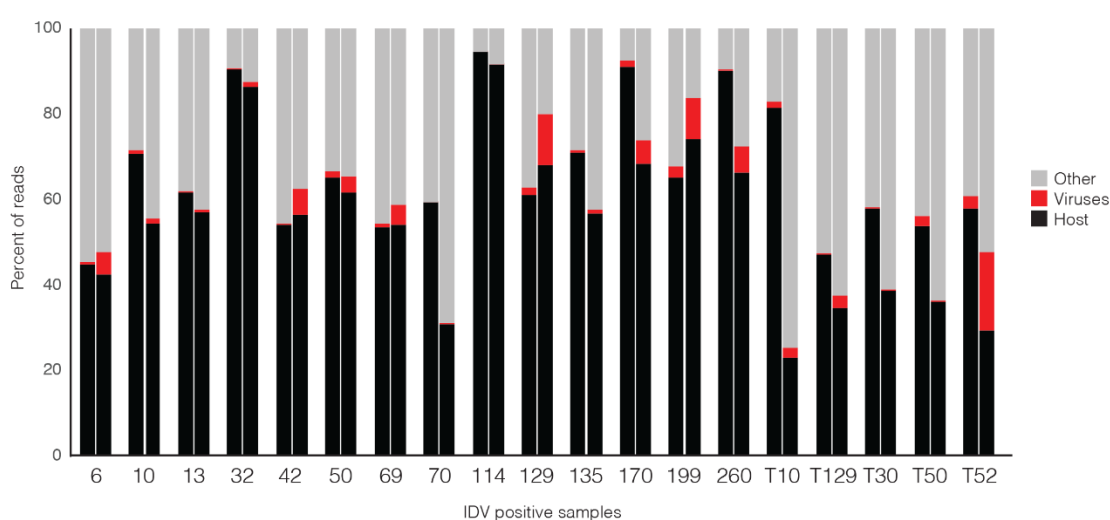

223

224 **Figure 3.** Proportions of reads corresponding to host, viruses or other taxa (bacteria,  
225 fungi, unclassified) from 19 IDV-positive samples sequenced using Nanopore  
226 sequencing (WIMP) (left bar in each pair) and MiSeq sequencing (right bar). Labels  
227 on the x-axis indicate individual specimens; tracheal samples are denoted by “T”  
228 before animal number.

### 229 3.3. Comparison of IDV detection by qPCR, MiSeq and Nanopore sequencing

230 The 19 samples selected for sequencing on the Nanopore GridION platform represented  
231 a range of IDV concentrations based on qPCR of 6.88 to  $6.25 \times 10^7$  genome copies per  
232 reaction, corresponding to Cq values ranging from 39.46 to as low as 16.99 (Table 1). The  
233 agreement of IDV detection between qPCR and Nanopore was 57.9% (in-house) and 84.2%  
234 (WIMP), and that between MiSeq and Nanopore was 89.5% (in-house) and 73.7% (WIMP).  
235 IDV was detected in the Nanopore data from all but one (18/19) of the IDV-positive samples  
236 when reads were classified using the WIMP application, but this proportion dropped to 11/19

237 when the in-house read assembly workflow was used. For most (7/8) of the samples with  
238 disparate results, 10 or fewer IDV reads were identified in the WIMP analysis. The exception  
239 was sample T10 with 29 IDV reads.

240 In order to explore qualitatively whether detection of other viruses in addition to IDV  
241 was comparable between the two metagenomic sequencing platforms, we compared the  
242 complete lists of viruses detected by MiSeq or Nanopore in the 19 IDV-positive samples.  
243 The number of different viruses detected in each sample varied from none to a maximum of  
244 four. The proportion of samples with perfect agreement between MiSeq and Nanopore (in-  
245 house) was 52.6%, by MiSeq and Nanopore (WIMP) was 47.4%; and by Nanopore (in-house)  
246 and Nanopore (WIMP) was 36.8% (Supplementary Table 1).

#### 247 **4. Discussion**

248 Metagenomic sequencing is transforming routine detection of viruses from traditional  
249 cell culture, antibody-antigen techniques and qPCR to detection of viruses in a target-  
250 independent manner. Sequencing approaches have now been widely applied for detection of  
251 known and novel agents in various types of clinical specimens in both human and veterinary  
252 medicine [26-28]. The potential usefulness of viral metagenomics for virus surveillance and  
253 diagnostics is still in debate due to its performance relative to the gold-standard method of  
254 real-time qPCR routinely employed in diagnostic laboratories [3]. A recent assessment of the  
255 performance of Nanopore, MiSeq and qPCR for detection of chikungunya and dengue  
256 viruses in serum or plasma samples with relatively high viral loads (Cq values from 14 to 32)  
257 demonstrated 100% agreement among these methods [1]. In this investigation, however, a  
258 maximum of 16 samples were multiplexed and sequenced using MiSeq, and each sample was  
259 sequenced individually on Nanopore [1]. This low degree of multiplexing translates to high  
260 analytical sensitivity, but correspondingly makes these technologies relatively more  
261 expensive per sample than expected, and decreases the potential application for routine

262 diagnostics. In our current study, we performed further exploration to assess the performance  
263 of metagenomic sequencing approaches with a higher degree of multiplexing of clinical  
264 samples in both MiSeq and Nanopore sequencing. IDV presented an excellent target for this  
265 comparison given its association with BRD in beef and dairy cattle, and the availability of  
266 specimens with a wider range of viral loads than has been included in previous investigations  
267 [19,20,32].

268 Different viral extraction kits have been demonstrated to have variable extraction  
269 efficiencies for different viruses in respiratory clinical samples [29]. The QIAamp MinElute  
270 Virus Spin Kit (MVSK) has been found to be generally applicable for isolating nucleic acid  
271 for qPCR or metagenomic virus identification of adenovirus, influenza virus A, human  
272 parainfluenza virus 3, human coronavirus OC43 and human metapneumovirus in respiratory  
273 clinical samples [29]. In our current study, the original nucleic acids extracted with the  
274 MVSK were used for both qPCR and metagenomic sequencing, eliminating the influence of  
275 different extraction methods and kits on our results (Figure 1a).

276 The IDV-specific qPCR assay detected its target in 22.8% (53/232) of specimens. While  
277 the majority of IDV positive samples with Cq value below 31 were detected by MiSeq, only  
278 1/36 samples with a Cq above this threshold were positive by sequencing (Figure 2). These  
279 results demonstrate that for samples where the viral load exceeds  $6.25 \times 10^2$  even a relatively  
280 modest MiSeq sequencing effort (50 samples multiplexed in a single flow cell) is sufficient  
281 to detect the virus. The agreement between qPCR and Nanopore of 57.9% (in-house) and  
282 84.2% (WIMP) demonstrated that relatively modest Nanopore sequencing effort (6 samples  
283 multiplexed) is also sufficient to detect the virus. The results from Nanopore sequencing (in-  
284 house), however, showed no consistent relationship between viral load and detection by  
285 sequencing; furthermore, no consistent relationship between viral load and proportion of viral  
286 reads was observed in either MiSeq or Nanopore sequencing (Table 1). For example, the two  
287 IDV positive samples 199 and 10 had Cq values of 26.01 and 24.09, respectively; however,

288 sample 199 had a higher proportion of IDV sequence reads in Nanopore and MiSeq than  
289 sample 10 (Table 1).

290 There are several possible explanations for differences in both the proportion of IDV  
291 reads and total viral reads detected in each sample by MiSeq and Nanopore. First, variation  
292 in the amounts of DNA used for sequencing library preparation for the two sequencing  
293 platforms may play an important role. Second, the abundance of virus relative to host or  
294 bacterial genetic material is a critical determinant of the detection threshold of metagenomic  
295 sequencing. A greater proportional abundance of a virus increases the chance that it will be  
296 detected by sequencing and improves the genome coverage obtained. Therefore, virus  
297 enrichment is commonly applied to clinical samples and enrichment methods such as those  
298 used in this study (a combination of centrifugation and nuclease-treatment) should lead to  
299 removal of bacteria and host cells, thus improving virus detection [30]. Virus propagation in  
300 cell culture is a less appealing method for virus enrichment since it is time-consuming,  
301 requires specific expertise and creates the potential for introduction of mutations [31].  
302 Reduction of the degree of multiplexing of samples is an alternative way to improve virus  
303 detection, but there is a corresponding increase in cost per sample and a corresponding  
304 reduction in throughput that are undesirable in research or clinical diagnostic settings.  
305 Reduction of the degree of multiplexing of samples also reduces the chances of cross-barcode  
306 contamination because barcode reagents are susceptible to cross-contamination [32].

307 Bioinformatic analysis in metagenomic sequencing remains challenging but is crucial  
308 for accurate identification of diagnostic targets. We used the comparable pipeline to analyze  
309 both data from MiSeq and Nanopore sequencing (in-house), which showed the exciting  
310 feasibility of metagenomic viral whole-genome-sequencing using both Nanopore and MiSeq  
311 technology with the assembled contigs covering from 10 to 95% of each IDV genome  
312 segment. Although de novo assembly was performed on Nanopore sequencing data, for the  
313 majority of the samples, the length of the largest contig was that of one single read. Skipping

314 the assembly step in bioinformatic analysis of Nanopore data could provide an advantage for  
315 timely identification of potential pathogens. The long reads of Nanopore sequencing is  
316 thought to provide good confidence for species level identification, but the low coverage  
317 combined with the error rates of this platform preclude its use for strain-level resolution [33].

318 The detection rates of IDV, the number or proportion of IDV reads (Table 1) and other  
319 viruses detected (Supplementary Table 1) from Nanopore (WIMP) and Nanopore (in-house)  
320 were different, which demonstrates that bioinformatic analysis affects the results of virus  
321 detection. Taxonomic classification in WIMP is based on Centrifuge [34], which compares  
322 query sequences to a (undescribed) reference database with a high speed and space-optimized  
323 k-mer-based algorithm. For Nanopore (in-house) and MiSeq analysis, BLAST [35] was used  
324 to compare assembled contig sequences to the NCBI RefSeq virus database, which is a more  
325 computationally intense process that produces more detailed results. The identification of a  
326 match using Centrifuge is based on probabilities of particular k-mer combinations occurring  
327 in the query and reference and not a consideration of the entire query sequence, thus  
328 increasing the possibility of false positives [34]. In contrast, Trinity assembly and then  
329 BLAST search against a reference database could lead to false negatives if the particular  
330 target sequence is very rare [36]. If there are very few reads derived from some component  
331 of the metagenome, these reads may not be included in the assembly since there is insufficient  
332 “evidence” to support building contigs from them [35,36]. The current lack of definition of  
333 the reference database or the ability to use custom databases with WIMP make this approach  
334 inappropriate for clinical diagnostic applications due to the difficulty of validating such  
335 approaches. Our results provide an illustration of the profound effects that post-sequencing  
336 analysis can have on results, and the trade-offs associated with each choice. Selection of the  
337 most appropriate analysis pipeline must consider the sequencing platform, as well as  
338 tolerance for false negatives and false positives, logistical considerations, and the required  
339 taxonomic resolution.



340 Analytical sensitivity is currently one of the main limitations of metagenomics. In this  
341 study, IDV was detected by MiSeq sequencing in specimens with qPCR Cq value as high as  
342 35.62 when 50 samples were multiplexed in comparison to a maximum Cq value of 39.46  
343 using Nanopore with multiplexing of 6 samples. For the IDV positive samples with low virus  
344 loads (e.g. sample 32), targeted qPCR may be preferable given its higher analytical  
345 sensitivity. Interestingly, we observed two samples that were IDV positive by both Nanopore  
346 (WIMP) and MiSeq but negative by qPCR (Samples T30 and T52, Table 1). These cases  
347 illustrate a potential advantage of metagenomic sequencing compared to qPCR since a likely  
348 explanation for this observation is that these specimens contained strain variants of IDV that  
349 were not detected by the qPCR assay. We were unable to determine if this was the case since  
350 the IDV sequence reads did not cover the region of the genome targeted by the species-  
351 specific qPCR assay. Targeted PCR assays for rapidly evolving RNA viruses require ongoing  
352 performance monitoring, and optimization of primers and probes [2]. No single method is  
353 suitable for application for all pathogens or specimen types, and each one has advantages in  
354 different circumstances.

355 Taken together our results demonstrate the potential of metagenomic sequencing on the  
356 Illumina MiSeq and Oxford Nanopore platforms for detection of viruses, including IDV, in  
357 clinical samples from naturally infected animals with a wide range of viral loads. While  
358 application of these approaches to screening animal populations or infectious disease  
359 research is feasible, their deployment for routine virology diagnostics in clinical settings will  
360 require additional research, laboratory and bioinformatic method development, and  
361 performance evaluation. Selection of appropriate methods will continue to require careful  
362 consideration of the numerous trade-offs that confront practitioners at each step of the  
363 investigation.

364

365 **Acknowledgments:** We thank Anju Tumber (Prairie Diagnostic Services, Inc.) for reagent  
366 purchasing and other logistics. We are grateful for Kara Toews, Anatoliy Trokhymchuk,  
367 Kazal Krishna Ghosh (PDS) for technical support.

368 **Author Contributions:** Conceptualization, M.D.Z, J.E.H and Y.Y.H.; methodology,  
369 M.D.Z.; software, M.D.Z and J.E.H.; validation, M.D.Z., Y.Y.H. and J.E.H.; formal analysis,  
370 M.D.Z.; investigation, Y.Y.H. and T.W.A.; resources, T.W.A.; data curation, M.D.Z., D.L.G.  
371 and J.E.H.; writing—original draft preparation, M.D.Z.; writing—review and editing, J.E.H.,  
372 C.F., Y.Y.H. and D.L.G.; visualization, M.D.Z. and J.E.H.; supervision, Y.Y.H. and J.E.H.;  
373 project administration, Y.Y.H.; funding acquisition, Y.Y.H.. All authors have read and  
374 agreed to the published version of the manuscript.

375 **Funding:** This work is supported by Saskatchewan Cattlemen’s Association (Grant/Award  
376 Number: SBIF2015-109), Agriculture Development Fund (Grant/Award Number:  
377 ADF20160092), and Beef Cattle Research Council (Grant/Award Number: AMR.10.17).  
378 Maodong Zhang is supported by China Scholarship Council (CSC).

379 **Conflicts of Interest:** The authors declared no potential conflicts of interest with respect to  
380 the research, authorship, and/or publication of this article.

## 381 **References**

- 382 1. Kafetzopoulou, L.E.; Efthymiadis, K.; Lewandowski, K.; Crook, A.; Carter, D.;  
383 Osborne, J.; Aarons, E.; Hewson, R.; Hiscox, J.A.; Carroll, M.W., et al. Assessment  
384 of metagenomic Nanopore and Illumina sequencing for recovering whole genome  
385 sequences of chikungunya and dengue viruses directly from clinical samples. *Euro*  
386 *Surveill* **2018**, *23*, doi:10.2807/1560-7917.Es.2018.23.50.1800228.
- 387 2. Andersen, K.G.; Shapiro, B.J.; Matranga, C.B.; Sealfon, R.; Lin, A.E.; Moses, L.M.;  
388 Folarin, O.A.; Goba, A.; Odia, I.; Ehiane, P.E., et al. Clinical Sequencing Uncovers  
389 Origins and Evolution of Lassa Virus. *Cell* **2015**, *162*, 738-750,  
390 doi:10.1016/j.cell.2015.07.020.
- 391 3. Filloux, D.; Fernandez, E.; Loire, E.; Claude, L.; Galzi, S.; Candresse, T.; Winter, S.;  
392 Jeeva, M.L.; Makesh Kumar, T.; Martin, D.P., et al. Nanopore-based detection and

- 393 characterization of yam viruses. *Sci Rep* **2018**, 8, 17879, doi:10.1038/s41598-018-  
394 36042-7.
- 395 4. Quick, J.; Loman, N.J.; Duraffour, S.; Simpson, J.T.; Severi, E.; Cowley, L.; Bore,  
396 J.A.; Koundouno, R.; Dudas, G.; Mikhail, A., et al. Real-time, portable genome  
397 sequencing for Ebola surveillance. *Nature* **2016**, 530, 228-232,  
398 doi:10.1038/nature16996.
- 399 5. Schadt, E.E.; Turner, S.; Kasarskis, A. A window into third-generation sequencing.  
400 *Hum Mol Genet* **2010**, 19, R227-240, doi:10.1093/hmg/ddq416.
- 401 6. Greninger, A.L.; Naccache, S.N.; Federman, S.; Yu, G.; Mbala, P.; Bres, V.; Stryke,  
402 D.; Bouquet, J.; Somasekar, S.; Linnen, J.M., et al. Rapid metagenomic identification  
403 of viral pathogens in clinical samples by real-time nanopore sequencing analysis.  
404 *Genome Med* **2015**, 7, 99, doi:10.1186/s13073-015-0220-9.
- 405 7. Buermans, H.P.; den Dunnen, J.T. Next generation sequencing technology: Advances  
406 and applications. *Biochim Biophys Acta* **2014**, 1842, 1932-1941,  
407 doi:10.1016/j.bbadis.2014.06.015.
- 408 8. Mitra, N.; Cernicchiaro, N.; Torres, S.; Li, F.; Hause, B.M. Metagenomic  
409 characterization of the virome associated with bovine respiratory disease in feedlot  
410 cattle identified novel viruses and suggests an etiologic role for influenza D virus. *J*  
411 *Gen Virol* **2016**, 97, 1771-1784, doi:10.1099/jgv.0.000492.
- 412 9. Ng, T.F.; Kondov, N.O.; Deng, X.; Van Eenennaam, A.; Neiberghs, H.L.; Delwart, E.  
413 A metagenomics and case-control study to identify viruses associated with bovine  
414 respiratory disease. *J Virol* **2015**, 89, 5340-5349, doi:10.1128/JVI.00064-15.
- 415 10. Zhang, M.; Hill, J.E.; Fernando, C.; Alexander, T.W.; Timsit, E.; van der Meer, F.;  
416 Huang, Y. Respiratory viruses identified in western Canadian beef cattle by  
417 metagenomic sequencing and their association with bovine respiratory disease.  
418 *Transbound Emerg Dis* **2019**, 66, 1379-1386, doi:10.1111/tbed.13172.
- 419 11. Ferguson, L.; Eckard, L.; Epperson, W.B.; Long, L.P.; Smith, D.; Huston, C.;  
420 Genova, S.; Webby, R.; Wan, X.F. Influenza D virus infection in Mississippi beef  
421 cattle. *Virology* **2015**, 486, 28-34, doi:10.1016/j.virol.2015.08.030.
- 422 12. Dane, H.; Duffy, C.; Guelbenzu, M.; Hause, B.; Fee, S.; Forster, F.; McMenamy,  
423 M.J.; Lemon, K. Detection of influenza D virus in bovine respiratory disease samples,  
424 UK. *Transbound Emerg Dis* **2019**, 10.1111/tbed.13273, doi:10.1111/tbed.13273.
- 425 13. Hause, B.M.; Collin, E.A.; Liu, R.; Huang, B.; Sheng, Z.; Lu, W.; Wang, D.; Nelson,  
426 E.A.; Li, F. Characterization of a novel influenza virus in cattle and Swine: proposal  
427 for a new genus in the Orthomyxoviridae family. *MBio* **2014**, 5, e00031-00014,  
428 doi:10.1128/mBio.00031-14.
- 429 14. Hause, B.M.; Ducatez, M.; Collin, E.A.; Ran, Z.; Liu, R.; Sheng, Z.; Armien, A.;  
430 Kaplan, B.; Chakravarty, S.; Hoppe, A.D., et al. Isolation of a novel swine influenza  
431 virus from Oklahoma in 2011 which is distantly related to human influenza C viruses.  
432 *PLoS Pathog* **2013**, 9, e1003176, doi:10.1371/journal.ppat.1003176.
- 433 15. Su, S.; Fu, X.; Li, G.; Kerlin, F.; Veit, M. Novel Influenza D virus: Epidemiology,  
434 pathology, evolution and biological characteristics. *Virulence* **2017**, 8, 1580-1591,  
435 doi:10.1080/21505594.2017.1365216.

- 436 16. White, S.K.; Ma, W.; McDaniel, C.J.; Gray, G.C.; Lednicky, J.A. Serologic evidence  
437 of exposure to influenza D virus among persons with occupational contact with cattle.  
438 *J Clin Virol* **2016**, *81*, 31-33, doi:10.1016/j.jcv.2016.05.017.
- 439 17. Zhai, S.L.; Zhang, H.; Chen, S.N.; Zhou, X.; Lin, T.; Liu, R.; Lv, D.H.; Wen, X.H.;  
440 Wei, W.K.; Wang, D., et al. Influenza D Virus in Animal Species in Guangdong  
441 Province, Southern China. *Emerg Infect Dis* **2017**, *23*, 1392-1396,  
442 doi:10.3201/eid2308.170059.
- 443 18. Sreenivasan, C.; Thomas, M.; Sheng, Z.; Hause, B.M.; Collin, E.A.; Knudsen, D.E.;  
444 Pillatzki, A.; Nelson, E.; Wang, D.; Kaushik, R.S., et al. Replication and  
445 Transmission of the Novel Bovine Influenza D Virus in a Guinea Pig Model. *J Virol*  
446 **2015**, *89*, 11990-12001, doi:10.1128/jvi.01630-15.
- 447 19. Timsit, E.; Workentine, M.; van der Meer, F.; Alexander, T. Distinct bacterial  
448 metacommunities inhabit the upper and lower respiratory tracts of healthy feedlot  
449 cattle and those diagnosed with bronchopneumonia. *Vet Microbiol* **2018**, *221*, 105-  
450 113, doi:10.1016/j.vetmic.2018.06.007.
- 451 20. Allander, T.; Tammi, M.T.; Eriksson, M.; Bjerkner, A.; Tiveljung-Lindell, A.;  
452 Andersson, B. Cloning of a human parvovirus by molecular screening of respiratory  
453 tract samples. *Proc Natl Acad Sci U S A* **2005**, *102*, 12891-12896,  
454 doi:10.1073/pnas.0504666102.
- 455 21. Faccini, S.; De Mattia, A.; Chiapponi, C.; Barbieri, I.; Boniotti, M.B.; Rosignoli, C.;  
456 Franzini, G.; Moreno, A.; Foni, E.; Nigrelli, A.D. Development and evaluation of a  
457 new Real-Time RT-PCR assay for detection of proposed influenza D virus. *J Virol*  
458 *Methods* **2017**, *243*, 31-34, doi:10.1016/j.jviromet.2017.01.019.
- 459 22. Langmead, B.; Salzberg, S.L. Fast gapped-read alignment with Bowtie 2. *Nat*  
460 *Methods* **2012**, *9*, 357-359, doi:10.1038/nmeth.1923.
- 461 23. Grabherr, M.G.; Haas, B.J.; Yassour, M.; Levin, J.Z.; Thompson, D.A.; Amit, I.;  
462 Adiconis, X.; Fan, L.; Raychowdhury, R.; Zeng, Q., et al. Full-length transcriptome  
463 assembly from RNA-Seq data without a reference genome. *Nat Biotechnol* **2011**, *29*,  
464 644-652, doi:10.1038/nbt.1883.
- 465 24. Li, H. Minimap2: pairwise alignment for nucleotide sequences. *Bioinformatics*  
466 (*Oxford, England*) **2018**, *34*, 3094-3100, doi:10.1093/bioinformatics/bty191.
- 467 25. Brister, J.R.; Ako-Adjei, D.; Bao, Y.; Blinkova, O. NCBI viral genomes resource.  
468 *Nucleic Acids Res* **2015**, *43*, D571-577, doi:10.1093/nar/gku1207.
- 469 26. Parker, J.; Chen, J. Application of next generation sequencing for the detection of  
470 human viral pathogens in clinical specimens. *J Clin Virol* **2017**, *86*, 20-26,  
471 doi:10.1016/j.jcv.2016.11.010.
- 472 27. Li, L.; Shan, T.; Wang, C.; Côté, C.; Kolman, J.; Onions, D.; Gulland, F.M.D.;  
473 Delwart, E. The Fecal Viral Flora of California Sea Lions. *J Virol* **2011**, *85*, 9909-  
474 9917, doi:10.1128/jvi.05026-11.
- 475 28. Shan, T.; Li, L.; Simmonds, P.; Wang, C.; Moeser, A.; Delwart, E. The Fecal Virome  
476 of Pigs on a High-Density Farm. *J Virol* **2011**, *85*, 11697-11708,  
477 doi:10.1128/jvi.05217-11.

- 478 29. Zhang, D.; Lou, X.; Yan, H.; Pan, J.; Mao, H.; Tang, H.; Shu, Y.; Zhao, Y.; Liu, L.;  
479 Li, J., et al. Metagenomic analysis of viral nucleic acid extraction methods in  
480 respiratory clinical samples. *BMC Genomics* **2018**, *19*, 773, doi:10.1186/s12864-018-  
481 5152-5.
- 482 30. Hall, R.J.; Wang, J.; Todd, A.K.; Bissielo, A.B.; Yen, S.; Strydom, H.; Moore, N.E.;  
483 Ren, X.; Huang, Q.S.; Carter, P.E., et al. Evaluation of rapid and simple techniques  
484 for the enrichment of viruses prior to metagenomic virus discovery. *J Virol Methods*  
485 **2014**, *195*, 194-204, doi:10.1016/j.jviromet.2013.08.035.
- 486 31. Quick, J.; Grubaugh, N.D.; Pullan, S.T.; Claro, I.M.; Smith, A.D.; Gangavarapu, K.;  
487 Oliveira, G.; Robles-Sikisaka, R.; Rogers, T.F.; Beutler, N.A., et al. Multiplex PCR  
488 method for MinION and Illumina sequencing of Zika and other virus genomes  
489 directly from clinical samples. *Nat Protoc* **2017**, *12*, 1261,  
490 doi:10.1038/nprot.2017.066
- 491 32. Esling, P.; Lejzerowicz, F.; Pawlowski, J. Accurate multiplexing and filtering for  
492 high-throughput amplicon-sequencing. *Nucleic Acids Res* **2015**, *43*, 2513-2524,  
493 doi:10.1093/nar/gkv107.
- 494 33. Tyler, A.D.; Mataseje, L.; Urfano, C.J.; Schmidt, L.; Antonation, K.S.; Mulvey, M.R.;  
495 Corbett, C.R. Evaluation of Oxford Nanopore's MinION Sequencing Device for  
496 Microbial Whole Genome Sequencing Applications. *Sci Rep* **2018**, *8*, 10931,  
497 doi:10.1038/s41598-018-29334-5.
- 498 34. Kim, D.; Song, L.; Breitwieser, F.P.; Salzberg, S.L. Centrifuge: rapid and sensitive  
499 classification of metagenomic sequences. *Genome Res* **2016**, *26*, 1721-1729,  
500 doi:10.1101/gr.210641.116.
- 501 35. Altschul, S.F.; Gish, W.; Miller, W.; Myers, E.W.; Lipman, D.J. Basic local  
502 alignment search tool. *Journal of molecular biology* **1990**, *215*, 403-410,  
503 doi:10.1016/s0022-2836(05)80360-2.
- 504 36. Bolger, A.M.; Lohse, M.; Usadel, B. Trimmomatic: a flexible trimmer for Illumina  
505 sequence data. *Bioinformatics (Oxford, England)* **2014**, *30*, 2114-2120,  
506 doi:10.1093/bioinformatics/btu170.

507

508

**Supplementary Table 1.** Summary of viruses detected by Nanopore and MiSeq sequencing.

| Sample* | MiSeq             | Nanopore (In-house) | Nanopore (WIMP)        |
|---------|-------------------|---------------------|------------------------|
| 6       | IDV               | IDV                 | IDV                    |
| 10      | BRSV, BRBV, IDV   | BRSV, BRBV, IDV     | BRSV, BRBV, IDV        |
| 32      | BNV               | BNV                 | BNV                    |
| 50      | BRBV, IDV         | BRBV, IDV           | BRBV, IDV              |
| 69      | IDV               | IDV                 | IDV                    |
| 129     | BRBV, IDV         | BRBV, IDV           | BRBV, IDV              |
| 170     | IDV               | IDV                 | IDV                    |
| 199     | BRSV, IDV, UBPV6  | BRSV, IDV, BPIV3    | BRSV, IDV, UBPV6       |
| T10     | BRSV, IDV         | BRSV                | BRSV, IDV              |
| 13      | IDV               | IDV                 | BRSV, BRBV, IDV        |
| T52     | BRBV, IDV         | IDV                 | BNV, IDV               |
| 42      | BCV, IDV          | BCV, IDV, BRSV      | BCV, IDV, BRSV, BNV    |
| 114     | BRBV, UTPV1       | ND                  | BRSV, BRBV, IDV, UTPV1 |
| T30     | BRBV, IDV         | BRBV                | BRBV, IDV, BNV         |
| T129    | BAV, IDV          | BAV, IDV            | BAV, IDV, BNV          |
| 260     | EVE, UTPV1, UBPV6 | ND                  | BRSV, BRBV, IDV        |
| 70      | BRAV              | ND                  | BRSV, BRBV, IDV        |
| 135     | BNV               | ND                  | BRSV, BRBV, IDV        |
| T50     | ND                | ND                  | BNV, IDV               |

**Footnote.** BCV: bovine coronavirus; IDV: influenza D virus; BRBV: bovine rhinitis B virus; BRAV: bovine rhinitis A virus; BRSV: bovine respiratory syncytial virus; BPIV3: bovine parainfluenza virus 3; EVE: enterovirus E; UTPV1: ungulate tetraparvovirus 1; UBPV6: ungulate bocaparvovirus 6; BNV: bovine nidovirus; BAV: bovine astrovirus; \*Samples beginning with T are tracheal, all others are nasal swabs, ND – not detected. WIMP – What’s in my pot.
